# Supplementary material
Source: PubMed Central journal article supplement (PMC5487614)
Supplement: AAC.02637-16_zac007176264s1.pdf [file AAC.02637-16_zac007176264s1.pdf]

(A)

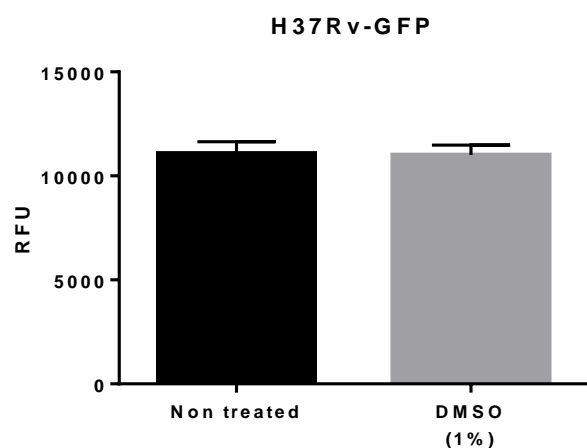

(B)

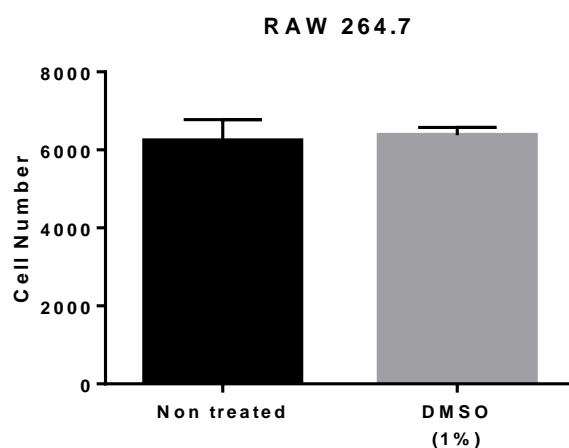

**Figure S1.** Effect of DMSO (1%) on **A.** Bacterial viability and **B.** RAW 264.7 macrophages survival (n=15). Experiments were conducted over a period of 5 days using the conditions described in the manuscript (medium and cell number).

**(A)**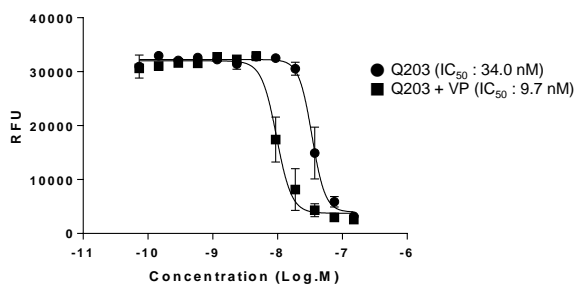**(B)**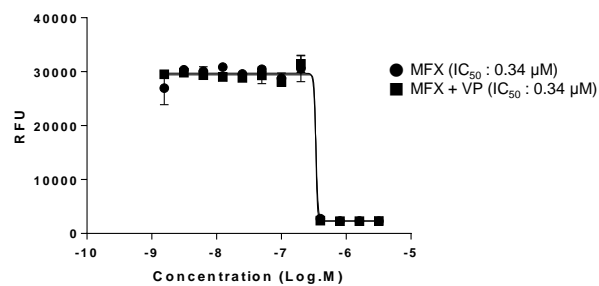**(C)**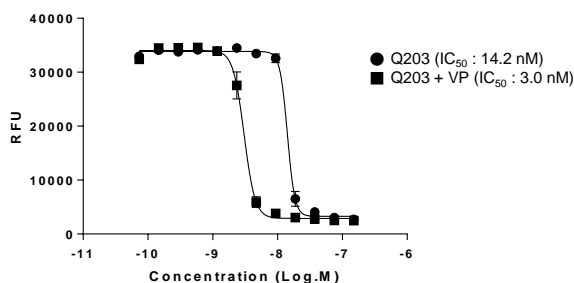**(D)**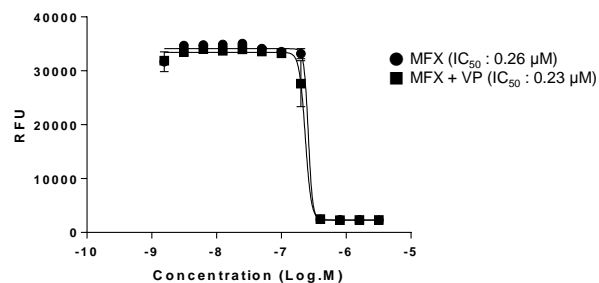**(E)**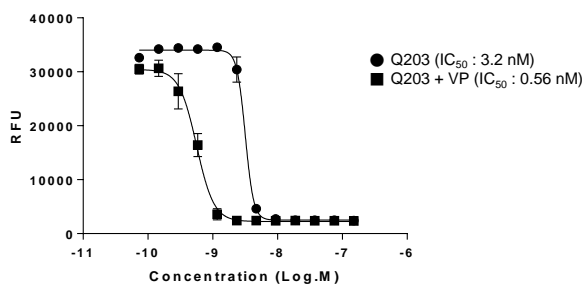**(F)**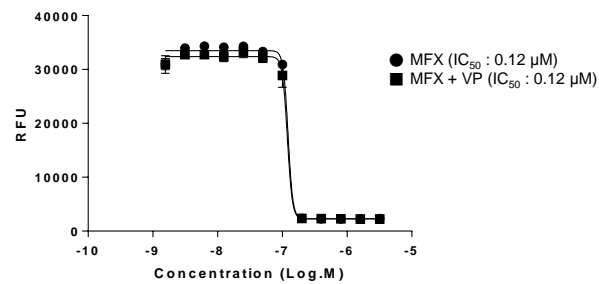**(G)**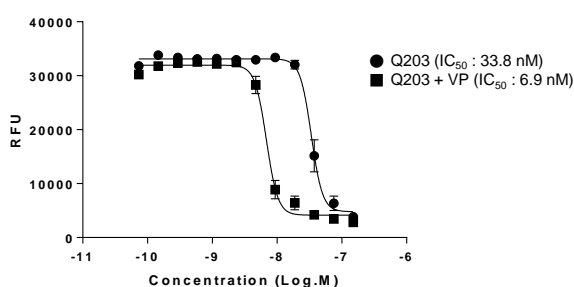**(H)**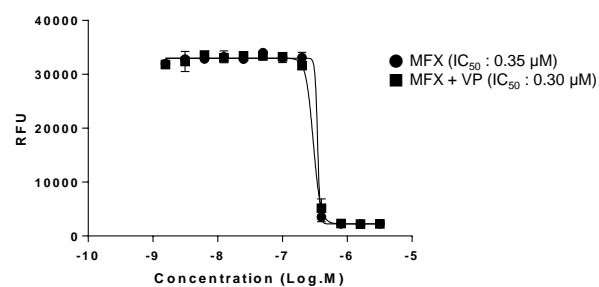**(I)**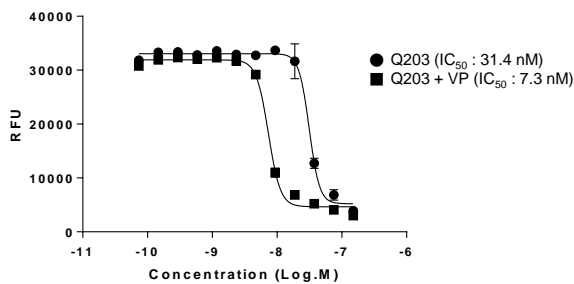**(J)**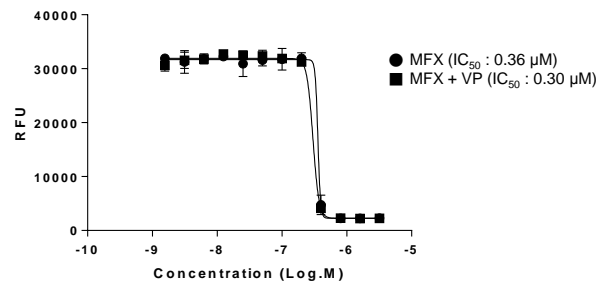**(K)**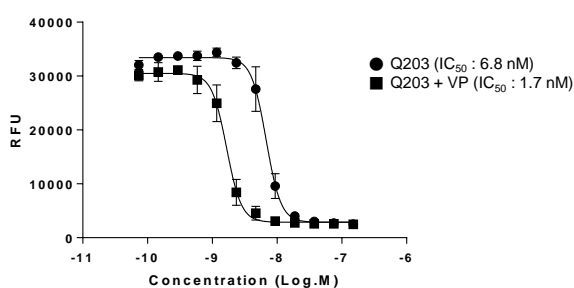**(L)**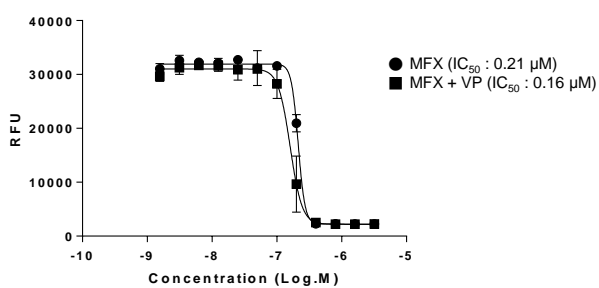

**Figure S2.** Dose-response curves obtained using REMA for the multidrug-resistant (MDR) clinical isolates. MDR1 (**A** and **B**), MDR2 (**C** and **D**), MDR3 (**E** and **F**), MDR4 (**G** and **H**), MDR5 (**I** and **J**), and MDR6 (**K** and **L**) were exposed to Q203, Q203 + verapamil (VP), moxifloxacin (MFX) and MFX + VP, as indicated. IC<sub>50</sub> values were determined using a sigmoidal dose-response curve fitting performed by Graph Pad Prism 6 software (version 6.05) and are indicated in parenthesis in the legend of each graph.

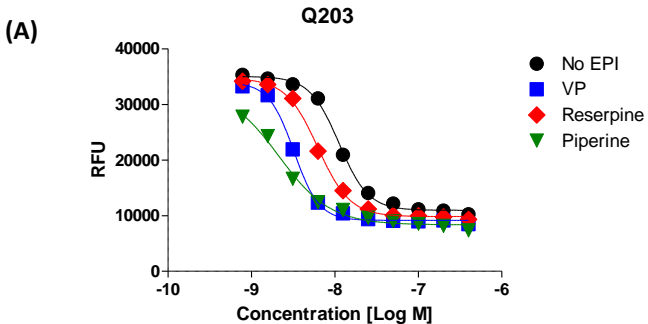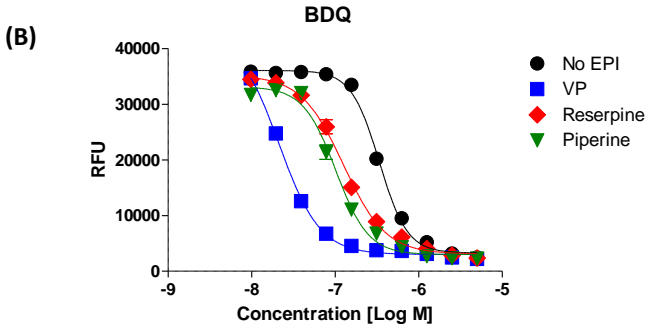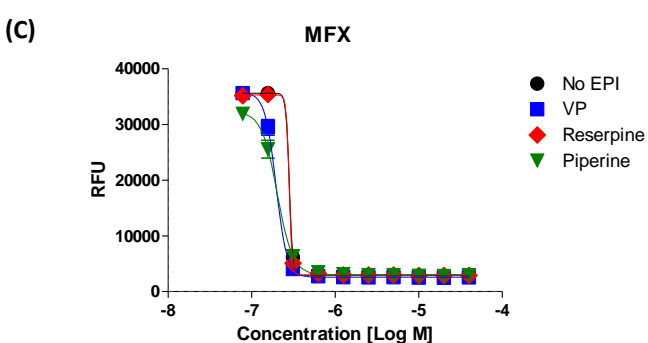

**Figure S3.** Effect of reserpine and piperine against *M. tuberculosis*, as determined using REMA. Curves were fitted using a sigmoidal dose-response curve performed by Graph Pad Prism 6 software (version 6.05).

**(A)**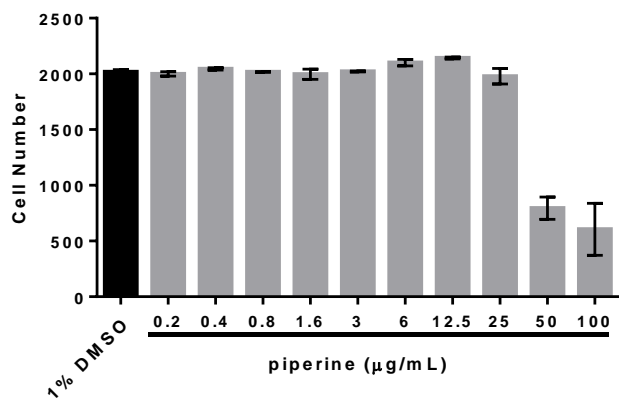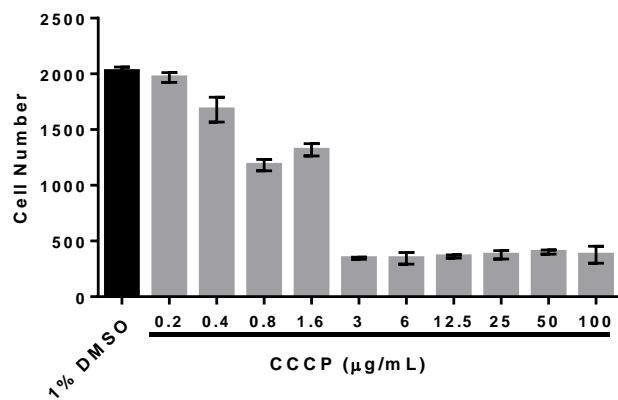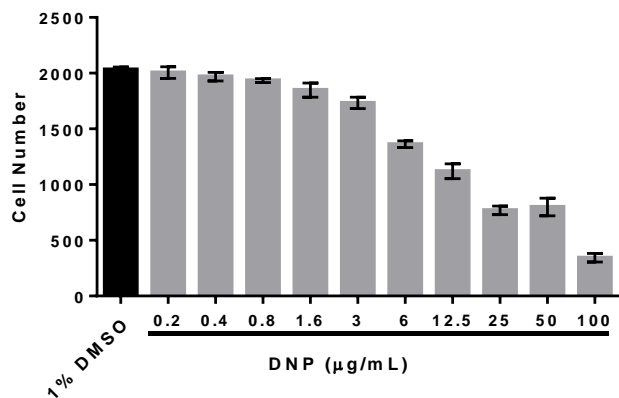**(B)**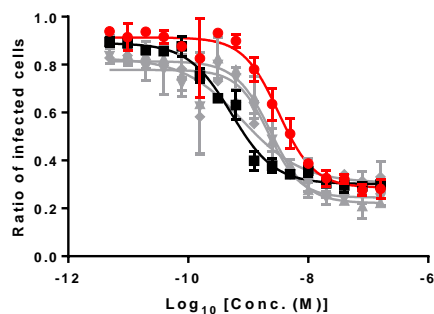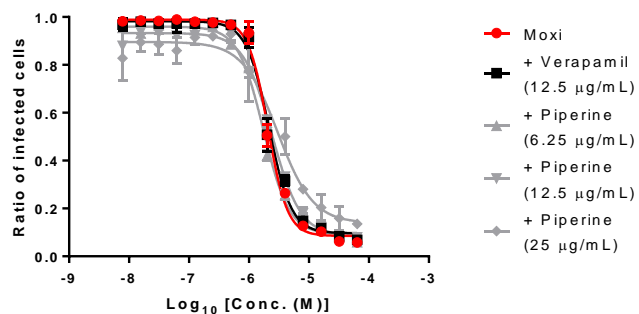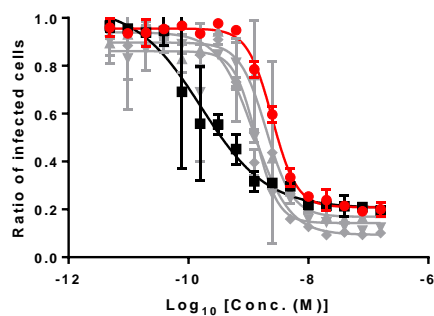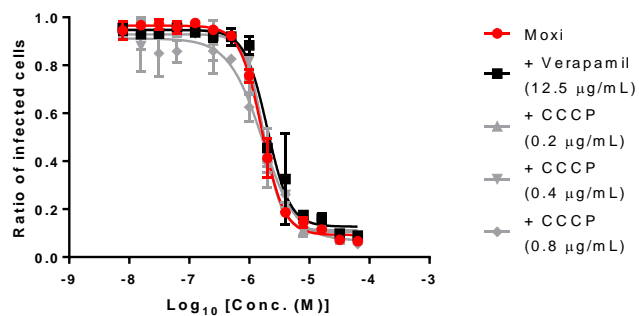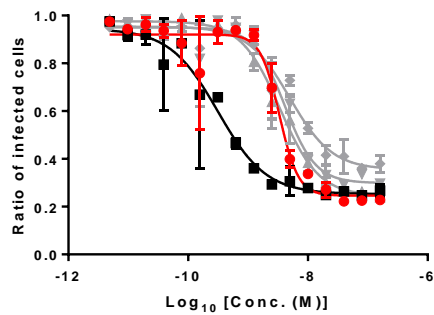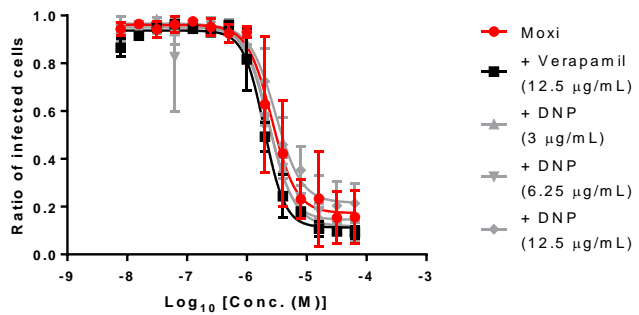

**Figure S4. A.** Cytotoxic effects of the efflux pump inhibitors (EPI) piperine, carbonyl cyanide 3-chlorophenylhydrazone (CCCP) and 2,4-dinitrophenol (DNP) on RAW 264.7 cells. Cells were incubated 5 days at 37°C, 5% CO<sub>2</sub> in presence of the EPI before staining for 20 min with 5 µM Syto 60 dye. Images were acquired using fluorescence microscopy and analyzed using in-house scripts to enumerate the number of cells. Three fields were averaged for each well and values shown are the average of 4 replicates. **B.** Dose-response curves of Q203 (left) and moxifloxacin (Moxi, right) showing the evolution of the ratio of infected macrophages as a function of the compound concentration. In red, the effect of the compound alone is shown; in black, the effect of the compound in combination with 12.5 µg/mL verapamil and in grey, the effect of the compound in combination with various doses of EPI. Curves were fitted using a sigmoidal dose-response curve performed by Graph Pad Prism 6 software (version 6.05). IC<sub>50</sub> values are summarized in **Table S1**.

Supplementary Table

Table S1. IC<sub>50</sub> values of Q203 and moxifloxacin against H37Rv-GFP replicating in macrophages, in presence or absence of EPIs.

| EPI       | EPI conc. µg/mL | Q203 (nM) | Moxifloxacin (µM) |
|-----------|-----------------|-----------|-------------------|
| No EPI    |                 | 3.9       | 2.3               |
| Verapamil | 12.5            | 0.41      | 2.1               |
| Piperine  | 6.25            | 2.5       | 2.0               |
| Piperine  | 12.5            | 2.7       | 2.8               |
| Piperine  | 25              | 0.75      | 2.9               |
| CCCP      | 0.2             | 2.1       | 1.8               |
| CCCP      | 0.4             | 1.5       | 1.8               |
| CCCP      | 0.8             | 1.4       | 1.9               |
| DNP       | 3.0             | 3.5       | 2.4               |
| DNP       | 6.25            | 4.0       | 2.5               |
| DNP       | 12.5            | 3.9       | 2.8               |
